# Supplementary figures and images for: Epidemiology of Mosquito-Borne Viruses in Egypt: A Systematic Review
Source: MDPI journal article supplement (doi:10.3390/v14071577), 2022-07-20

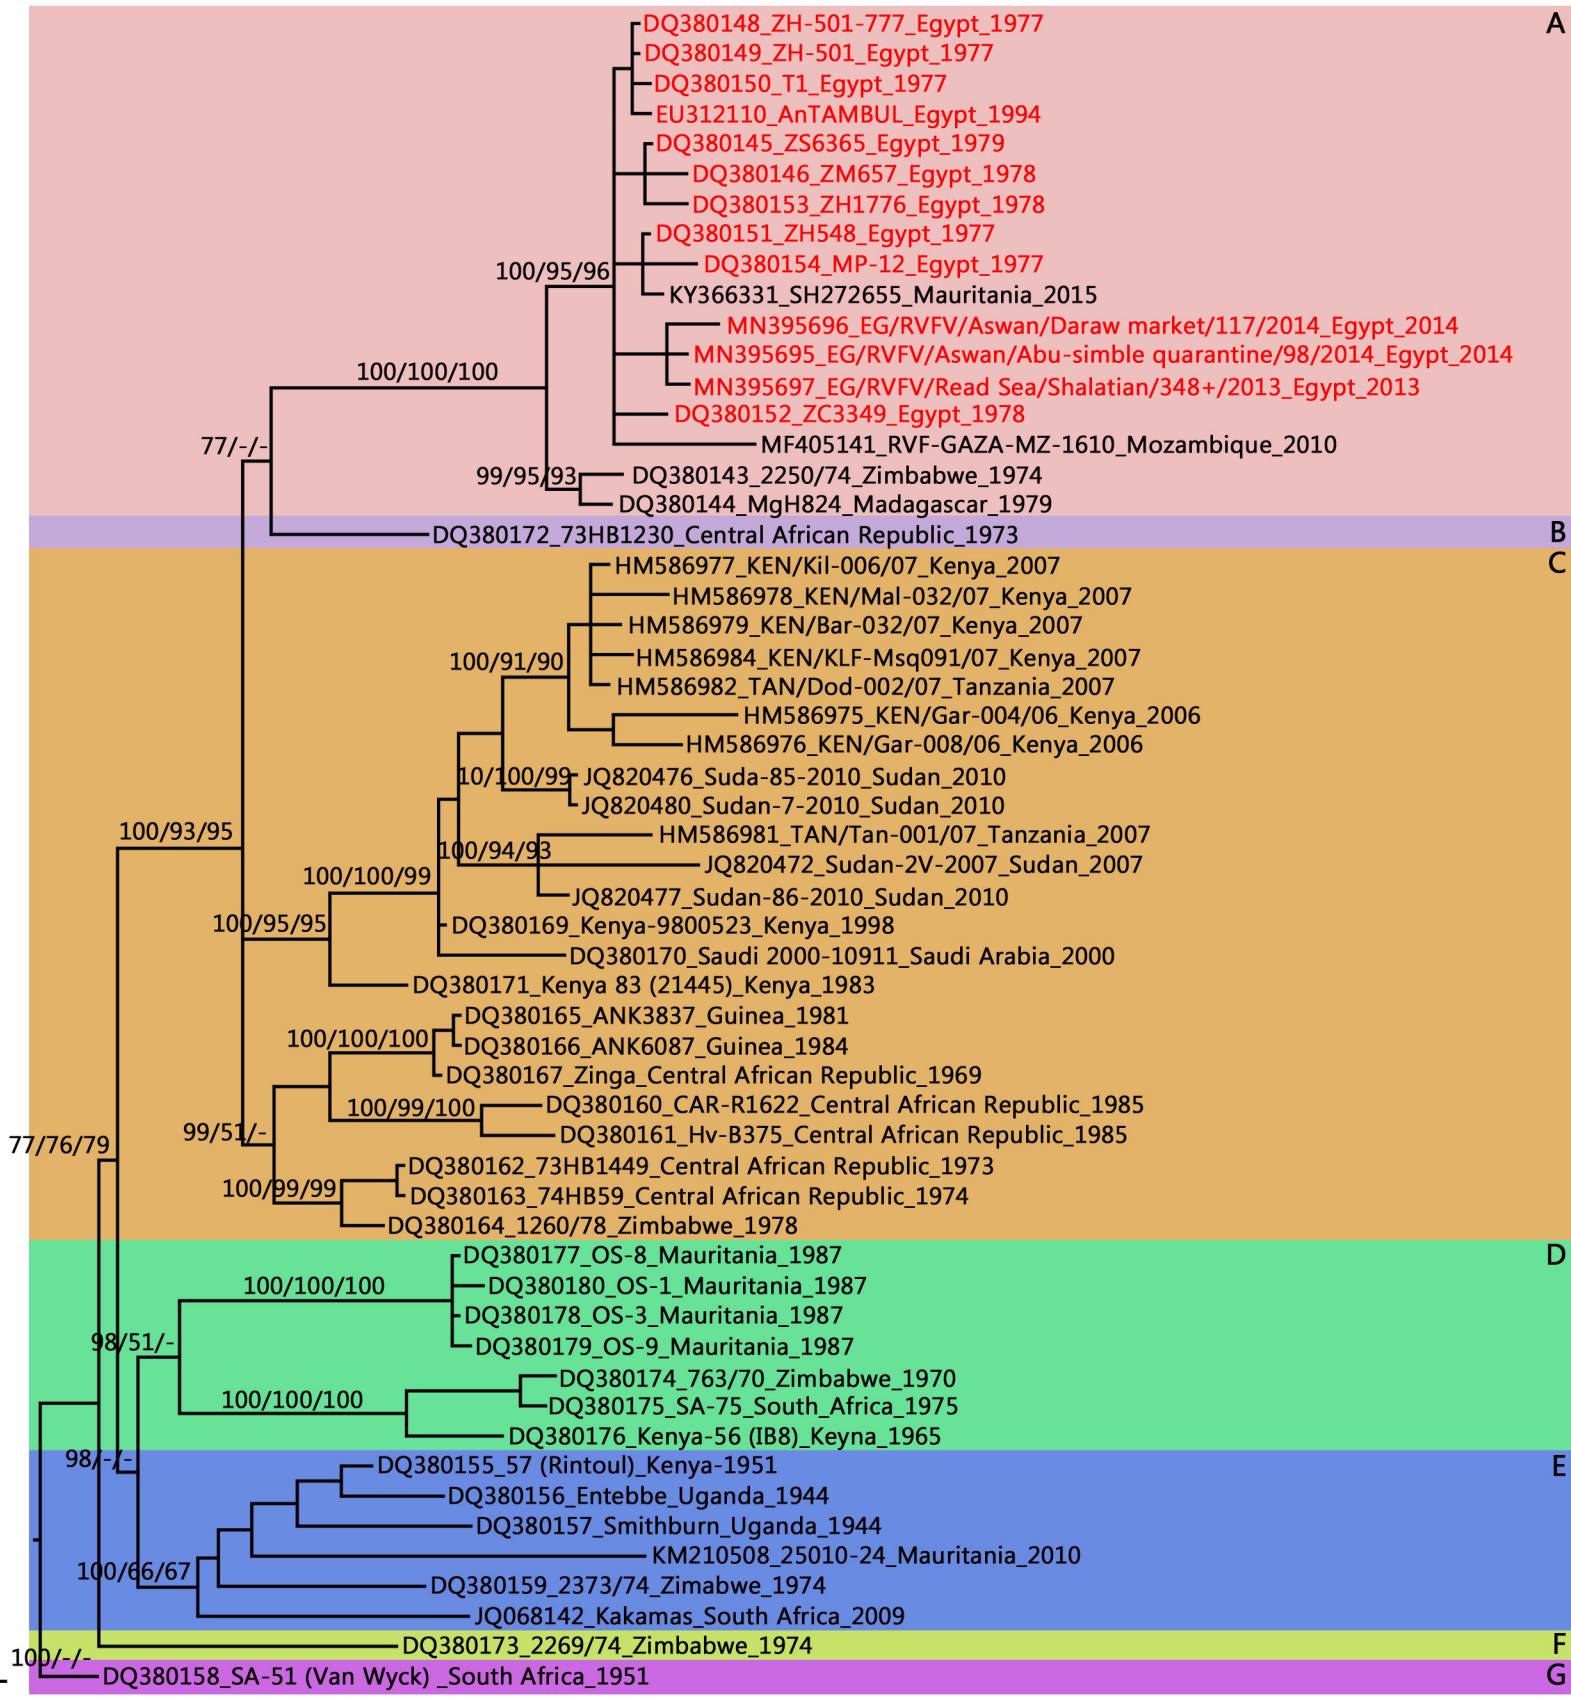

Supplement: s1 [file s1]
